# Supplementary material
Source: PubMed Central journal article supplement (PMC4005042)
Supplement: NIHMS571919-supplement-1.pdf [file NIHMS571919-supplement-1.pdf]

| Genotype                 | Cell line    | Sequenom BRAF | Sequenom NRAS |
|--------------------------|--------------|---------------|---------------|
| BRAF (other)             | SK-Mel-208   | G466E         | WT            |
| BRAF (other)             | SK-Mel-246   | G469A         | WT            |
| BRAF V600E               | SK-Mel-5     | V600E         | WT            |
| BRAF V600E               | SK-Mel-131   | V600E         | WT            |
| BRAF V600E               | SK-Mel-174   | V600E         | WT            |
| BRAF V600E               | SK-Mel-233   | V600E         | WT            |
| BRAF V600E               | SK-Mel-237   | V600E         | WT            |
| BRAF V600E               | SK-Mel-252   | V600E         | WT            |
| BRAF V600E               | SK-Mel-282   | V600E         | WT            |
| BRAF V600E               | SK-Mel-306   | V600E         | WT            |
| BRAF V600E               | SK-Mel-330   | V600E         | WT            |
| BRAF V600E               | SK-Mel-334   | V600E         | WT            |
| BRAF V600E               | SK-Mel-339   | V600E         | WT            |
| BRAF V600E               | SK-Mel-359   | V600E         | WT            |
| BRAF V600E               | SK-Mel-364   | V600E         | WT            |
| BRAF V600E               | SK-Mel-390   | V600E         | WT            |
| BRAF V600E               | Sk-Mel-413-2 | V600E         | WT            |
| BRAF V600E               | SK-Mel-426   | V600E         | WT            |
| BRAF V600E               | SK-Mel-447   | V600E         | WT            |
| BRAF V600E               | SK-Mel-462   | V600E         | WT            |
| BRAF V600E               | SK-Mel-479   | V600E         | WT            |
| BRAF V600E               | SK-Mel-495   | V600E         | WT            |
| BRAF V600E               | SK-Mel-498   | V600E         | WT            |
| BRAF V600E               | SK-Mel-506   | V600E         | WT            |
| BRAF V600E               | SK-Mel-507   | V600E         | WT            |
| BRAF V600E               | SK-Mel-529   | V600E         | WT            |
| BRAF V600E               | Sk-Mel-457   | V600E         | WT            |
| BRAF V600E               | SK-Mel-483   | V600E         | WT            |
| BRAF V600E               | SK-Mel-513   | V600E         | WT            |
| BRAF V600E               | SK-Mel-1     | V600E         | WT            |
| BRAF V600E               | SK-Mel-7     | V600E         | WT            |
| BRAF V600E               | SK-Mel-11    | V600E         | WT            |
| BRAF V600E               | SK-Mel-12    | V600E         | WT            |
| BRAF V600E               | SK-Mel-13    | V600E         | WT            |
| BRAF V600E               | SK-Mel-19    | V600E         | WT            |
| BRAF V600E               | SK-Mel-22    | V600E         | WT            |
| BRAF V600E               | SK-Mel-26    | V600E         | WT            |
| BRAF V600E               | SK-Mel-27    | V600E         | WT            |
| BRAF V600E               | SK-Mel-28    | V600E         | WT            |
| BRAF V600E               | SK-Mel-29    | V600E         | WT            |
| BRAF V600E               | SK-Mel-32    | V600E         | WT            |
| BRAF V600E               | SK-Mel-37    | V600E         | WT            |
| BRAF V600E               | SK-Mel-39    | V600E         | WT            |
| BRAF V600E               | SK-Mel-40    | V600E         | WT            |
| BRAF V600E               | SK-Mel-41    | V600E         | WT            |
| BRAF V600E               | SK-Mel-73    | V600E         | WT            |
| BRAF V600E               | SK-Mel-100   | V600E         | WT            |
| BRAF V600E               | SK-Mel-105   | V600E         | WT            |
| BRAF V600E               | SK-Mel-133   | V600E         | WT            |
| BRAF V600E               | SK-Mel-170   | V600E         | WT            |
| BRAF V600E               | SK-Mel-178   | V600E         | WT            |
| BRAF V600E               | SK-Mel-181   | V600E         | WT            |
| BRAF V600E               | SK-Mel-188   | V600E         | WT            |
| BRAF V600E               | SK-Mel-190   | V600E         | WT            |
| BRAF V600E               | SK-Mel-192   | V600E         | WT            |
| BRAF V600E               | SK-Mel-196   | V600E         | WT            |
| BRAF V600E               | SK-Mel-197   | V600E         | WT            |
| BRAF V600E               | SK-Mel-200   | V600E         | WT            |
| BRAF V600E               | SK-Mel-202   | V600E         | WT            |
| BRAF V600E               | SK-Mel-207   | V600E         | WT            |
| BRAF V600E               | SK-Mel-222   | V600E         | WT            |
| BRAF V600E               | SK-Mel-227   | V600E         | WT            |
| BRAF V600E               | SK-Mel-228   | V600E         | WT            |
| BRAF V600E               | SK-Mel-230   | V600E         | WT            |
| BRAF V600E               | SK-Mel-232   | V600E         | WT            |
| BRAF V600E               | SK-Mel-238   | V600E         | WT            |
| BRAF V600E               | SK-Mel-239   | V600E         | WT            |
| BRAF V600E               | SK-Mel-243   | V600E         | WT            |
| BRAF V600E               | SK-Mel-244   | V600E         | WT            |
| BRAF V600E               | SK-Mel-256   | V600E         | WT            |
| BRAF V600E               | SK-Mel-267   | V600E         | WT            |
| BRAF V600E               | SK-Mel-268   | V600E         | WT            |
| BRAF V600E               | SK-Mel-269   | V600E         | WT            |
| BRAF V600E               | SK-Mel-271   | V600E         | WT            |
| BRAF V600E               | SK-Mel-272   | V600E         | WT            |
| BRAF V600E               | SK-Mel-275   | V600E         | WT            |
| BRAF V600E               | SK-Mel-276   | V600E         | WT            |
| BRAF V600E               | SK-Mel-279   | V600E         | WT            |
| BRAF V600E               | SK-Mel-283   | V600E         | WT            |
| BRAF V600E               | SK-Mel-284   | V600E         | WT            |
| BRAF V600E               | SK-Mel-441   | V600E         | WT            |
| BRAF V600E               | A2058        | V600E         | WT            |
| BRAF V600E               | A375         | V600E         | WT            |
| BRAF V600E               | Malme3M      | V600E         | WT            |
| BRAF V600E               | WM88         | V600E         | WT            |
| BRAF V600E               | SK-Mel-15    | V600E         | WT            |
| BRAF V600E               | SK-Mel-279   | V600E         | WT            |
| BRAF V600E               | WM793        | V600E         | WT            |
| BRAF and NRAS            | SK-Mel-209   | V600E         | Q61K          |
| BRAF (nonV600E) and NRAS | SK-Mel-85    | G469S         | Q61R          |
| BRAF V600K               | SK-Mel-64    | V600K         | WT            |
| BRAF V600K               | SK-Mel-153   | V600K         | WT            |

Supplemental Table S1 Cont.

| Genotype  | Cell line         | Sequenom BRAF | Sequenom NRAS |
|-----------|-------------------|---------------|---------------|
| NRAS Q61K | SK-Mel-307        | WT            | Q61K          |
| NRAS Q61K | SK-Mel-410        | WT            | Q61K          |
| NRAS Q61K | SK-Mel-455        | WT            | Q61K          |
| NRAS Q61K | SK-Mel-21         | WT            | Q61K          |
| NRAS Q61K | SK-Mel-30         | WT            | Q61K          |
| NRAS Q61K | SK-Mel-90         | WT            | Q61K          |
| NRAS Q61K | SK-Mel-109        | WT            | Q61K          |
| NRAS Q61K | SK-Mel-117        | WT            | Q61K          |
| NRAS Q61K | SK-Mel-173        | WT            | Q61K          |
| NRAS Q61K | SK-Mel-186        | WT            | Q61K          |
| NRAS Q61K | SK-Mel-229        | WT            | Q61K          |
| NRAS Q61L | SK-Mel-321A       | WT            | Q61L          |
| NRAS Q61L | SK-Mel-369        | WT            | Q61L          |
| NRAS Q61L | SK-Mel-127        | WT            | Q61L          |
| NRAS Q61R | SK-Mel-301        | WT            | Q61R          |
| NRAS Q61R | SK-Mel-325        | WT            | Q61R          |
| NRAS Q61R | SK-Mel-367        | WT            | Q61R          |
| NRAS Q61R | SK-Mel-394        | WT            | Q61R          |
| NRAS Q61R | SK-Mel-534A       | WT            | Q61R          |
| NRAS Q61R | SK-Mel-538        | WT            | Q61R          |
| NRAS Q61R | SK-Mel-2          | WT            | Q61R          |
| NRAS Q61R | SK-Mel-103        | WT            | Q61R          |
| NRAS Q61R | SK-Mel-119        | WT            | Q61R          |
| NRAS Q61R | SK-Mel-130        | WT            | Q61R          |
| NRAS Q61R | SK-Mel-147        | WT            | Q61R          |
| NRAS Q61R | SK-Mel-182        | WT            | Q61R          |
| NRAS Q61R | SK-Mel-191        | WT            | Q61R          |
| NRAS Q61R | SK-Mel-199        | WT            | Q61R          |
| NRAS Q61R | SK-Mel-205        | WT            | Q61R          |
| NRAS Q61R | SK-Mel-210        | WT            | Q61R          |
| NRAS Q61R | SK-Mel-234        | WT            | Q61R          |
| WT        | SK-Mel-464b       | WT            | WT            |
| WT        | SK-Mel-444        | WT            | WT            |
| WT        | SK-Mel-304        | WT            | WT            |
| WT        | SK-Mel-309        | WT            | WT            |
| WT        | SK-Mel-316        | WT            | WT            |
| WT        | SK-Mel-318        | WT            | WT            |
| WT        | SK-Mel-321B       | WT            | WT            |
| WT        | SK-Mel-323        | WT            | WT            |
| WT        | SK-Mel-326        | WT            | WT            |
| WT        | SK-Mel-332        | WT            | WT            |
| WT        | SK-Mel-346        | WT            | WT            |
| WT        | SK-Mel-351        | WT            | WT            |
| WT        | SK-Mel-366        | WT            | WT            |
| WT        | SK-Mel-380        | WT            | WT            |
| WT        | SK-Mel-381        | WT            | WT            |
| WT        | SK-Mel-391        | WT            | WT            |
| WT        | SK-Mel-393        | WT            | WT            |
| WT        | SK-Mel-398        | WT            | WT            |
| WT        | SK-Mel-400        | WT            | WT            |
| WT        | SK-Mel-406        | WT            | WT            |
| WT        | SK-Mel-408        | WT            | WT            |
| WT        | SK-Mel-412Parotid | WT            | WT            |
| WT        | SK-Mel-423A       | WT            | WT            |
| WT        | SK-Mel-423B       | WT            | WT            |
| WT        | SK-Mel-427        | WT            | WT            |
| WT        | SK-Mel-428        | WT            | WT            |
| WT        | SK-Mel-430        | WT            | WT            |
| WT        | SK-Mel-431        | WT            | WT            |
| WT        | SK-Mel-432        | WT            | WT            |
| WT        | SK-Mel-435        | WT            | WT            |
| WT        | SK-Mel-445        | WT            | WT            |
| WT        | SK-Mel-451        | WT            | WT            |
| WT        | SK-Mel-452        | WT            | WT            |
| WT        | SK-Mel-464a       | WT            | WT            |
| WT        | SK-Mel-481        | WT            | WT            |
| WT        | SK-Mel-509        | WT            | WT            |
| WT        | SK-Mel-524        | WT            | WT            |
| WT        | SK-Mel-24         | WT            | WT            |
| WT        | SK-Mel-31         | WT            | WT            |
| WT        | SK-Mel-35         | WT            | WT            |
| WT        | SK-Mel-36         | WT            | WT            |
| WT        | SK-Mel-75         | WT            | WT            |
| WT        | SK-Mel-110        | WT            | WT            |
| WT        | SK-Mel-113        | WT            | WT            |
| WT        | SK-Mel-118        | WT            | WT            |
| WT        | SK-Mel-146        | WT            | WT            |
| WT        | SK-Mel-161        | WT            | WT            |
| WT        | SK-Mel-176        | WT            | WT            |
| WT        | SK-Mel-187        | WT            | WT            |
| WT        | SK-Mel-215        | WT            | WT            |
| WT        | SK-Mel-217        | WT            | WT            |
| WT        | SK-Mel-264        | WT            | WT            |
| WT        | SK-Mel-265        | WT            | WT            |
| WT        | SK-Mel-266        | WT            | WT            |
| WT        | SK-Mel-285        | WT            | WT            |
| WT        | SK-Mel-315-05     | WT            | WT            |
| WT        | SK-Mel-446        | WT            | WT            |
| WT        | SK-Mel-459        | WT            | WT            |
| WT        | SK-Mel-313        | WT            | WT            |
| WT        | SK-Mel-315-02     | WT            | WT            |
| WT        | SK-Mel-411        | WT            | WT            |
| WT        | SK-Mel-439        | WT            | WT            |
| WT        | SK-Mel-23         | WT - Amp      | WT            |
| WT        | MeWo              | WT            | WT            |
| WT        | WM1361            | WT            | WT            |
| WT        | WM1382            | WT            | WT            |

Supplemental Table S2.1

## MAPK pathway alterations identified in the cohort WT for BRAF/NRAS by Sequenom

| Cell line  | Sequenom NRAS | Sequenom BRAF | Sanger mutations detected | IMPACT                                                     | 244k or 1M Agilent CGH                            |
|------------|---------------|---------------|---------------------------|------------------------------------------------------------|---------------------------------------------------|
| SK-Mel-23  | WT            | WT            | ---                       | BRAF amplification                                         | Broad 7q gain, BRAF amplification, PTEN deletion  |
| SK-Mel-266 | WT            | WT            | NF1 L161F                 | NF1 L161*, NF1 Q282*                                       | Broad 7q gain                                     |
| SK-Mel-113 | WT            | WT            | ---                       | NF1 homozygous deletion                                    | Focal NF1 deletion                                |
| SK-Mel-217 | WT            | WT            | ---                       | KRAS amplification; focal intragenic NF1 deletion          | KRAS amplification; focal NF1 deletion            |
| MeWo       | WT            | WT            | NF1 Q1336*                | NF1 Q1336*, heterozygous NF1 deletion, p53 Q317* and E258K | Focal NF1 deletion                                |
| SK-Mel-118 | WT            | WT            | KRAS G13R                 | KRAS amplification; KRAS G13R                              | KRAS gain                                         |
| SK-Mel-285 | WT            | WT            | KRAS G12C                 | ---                                                        |                                                   |
| SK-Mel-110 | WT            | WT            | KRAS E63K                 | ---                                                        |                                                   |
| SK-Mel-146 | WT            | WT            | HRAS Q61K                 | ---                                                        |                                                   |
| SK-Mel-215 | WT            | WT            | BRAF N581S                | ---                                                        | Broad 7q gain                                     |
| SK-Mel-264 | WT            | WT            | BRAF D594G                | ---                                                        |                                                   |
| WM1382     | WT            | WT            | KIT N822K                 | ---                                                        | KIT amplification, CDK4 amplification, ERBB3 gain |
| WM3211     | WT            | WT            | KIT L576P                 | ---                                                        | ---                                               |
| WM3918     | ---           | ---           | ---                       | Focal NF1 deletion                                         | ---                                               |

Supplemental Table S2.2

## NF1 alterations identified in the BRAF/NRAS mutant cohort

| Cell line  | Sequenom NRAS | Sequenom BRAF | Sanger mutations detected | IMPACT                                       | 244k or 1M Agilent CGH |
|------------|---------------|---------------|---------------------------|----------------------------------------------|------------------------|
| SK-Mel-103 | Q61R          | WT            | ---                       | NRAS Q61R, Focal NF1 deletion, TP53 deletion | Focal NF1 deletion     |
| M308       | WT            | V600E         | ---                       | BRAF V600E, NF1 Q1070*                       |                        |
